# Supplementary material
Source: PubMed Central journal article supplement (PMC2957655)
Supplement: NIHMS239727-supplement-Supplementary_Material.pdf [file NIHMS239727-supplement-Supplementary_Material.pdf]

# Deletion of the protein tyrosine phosphatase gene *PTPN2* in T-cell acute lymphoblastic leukemia

Maria Kleppe, Idoya Lahortiga, Tiama El Chaar, Kim De Keersmaecker, Nicole Mentens, Carlos Graux, Katrien Van Roosbroeck, Adolfo A. Ferrando, Anton W. Langerak, Jules P.P. Meijerink, François Sigaux, Torsten Haferlach, Iwona Wlodarska, Peter Vandenberghe, Jean Soulier, Jan Cools

---

## Supplementary Material

### Supplementary Figures

- Supplementary Figure 1.** Array CGH analysis of one individual with T-ALL.
- Supplementary Figure 2.** Array CGH and qPCR analysis confirms homozygous deletion of *PTPN2*.
- Supplementary Figure 3.** Alignment of the two *Alu* elements flanking the *PTPN2* gene.
- Supplementary Figure 4.** Heterozygous deletion of *PTPN2* in *TLX1* positive T-ALL.
- Supplementary Figure 5.** Gene expression analysis of T-ALL individual 7.
- Supplementary Figure 6.** Schematic representation of CpG-rich regions near the *PTPN2* transcription start analyzed for DNA methylation.
- Supplementary Figure 7.** *PTPN2* expression peaks at the CD4<sup>+</sup>CD8<sup>+</sup>CD3<sup>-/low</sup> stage of T-cell development.
- Supplementary Figure 8.** Proliferative advantage and decreased sensitivity to LCK inhibitor PP2 due to knockdown of *PTPN2*.

### Supplementary Tables

- Supplementary Table 1.** Cytogenetic and molecular findings in individuals with *PTPN2* deletion.
- Supplementary Table 2.** Primer sequences.

# Supplementary Figures

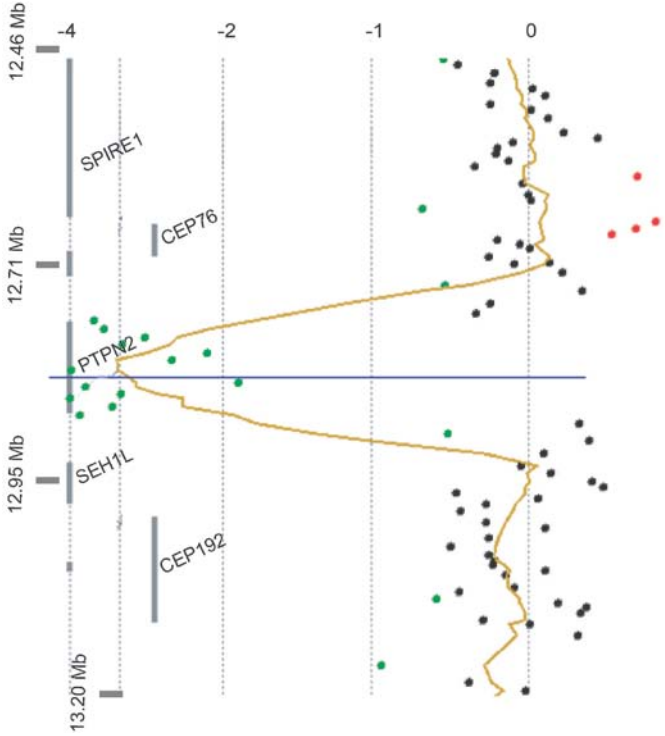

**Supplementary Figure 1. Array CGH analysis of one individual with T-ALL.**

Array CGH analysis of individual 1 demonstrates a focal homozygous deletion of about 125kb restricted to the *PTPN2* locus.

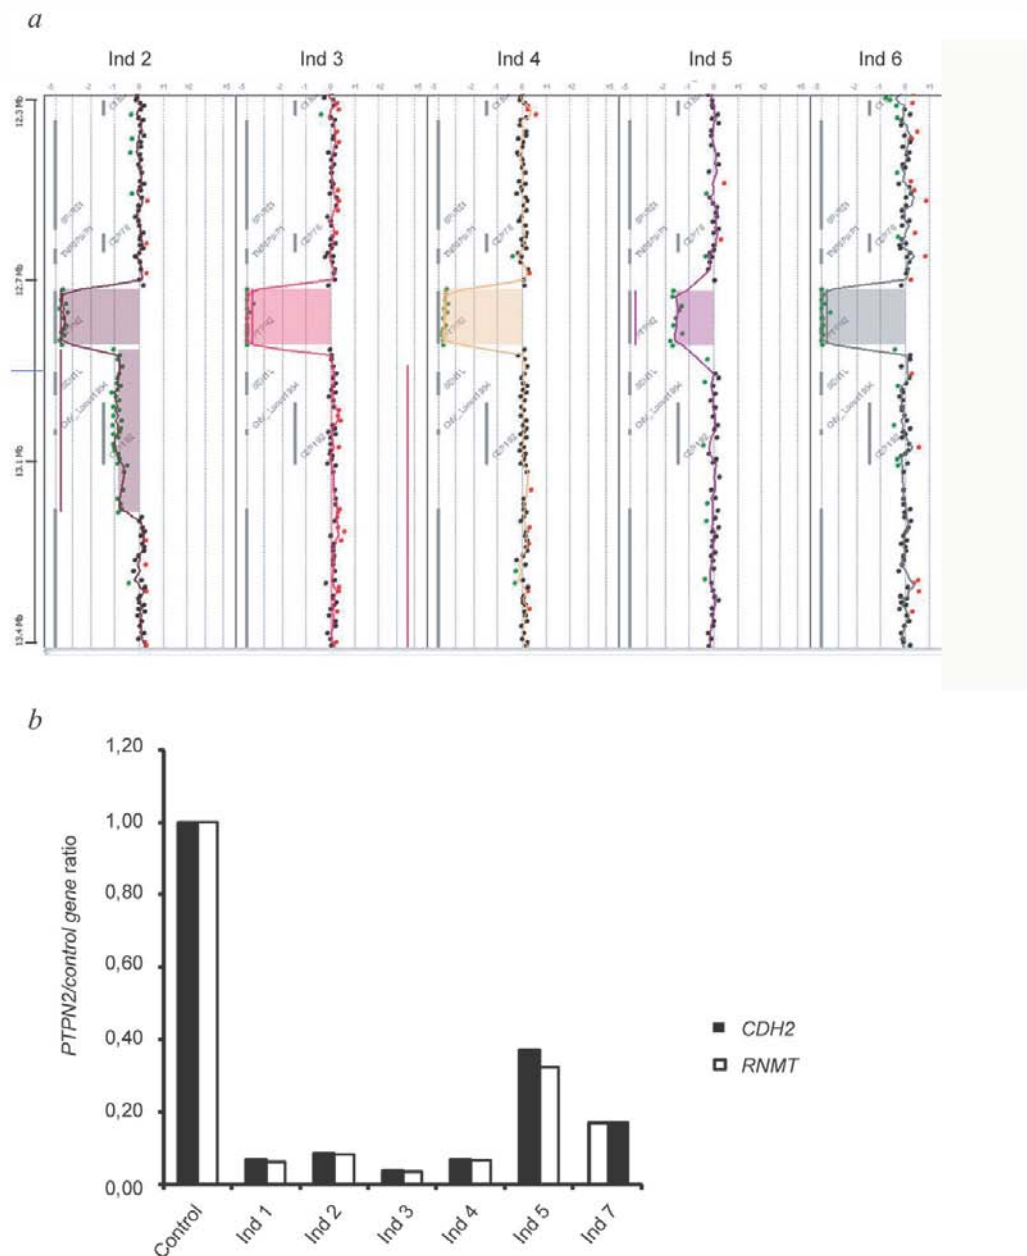

**Supplementary Figure 2. Array CGH and quantitative PCR analysis confirms homozygous deletion of *PTPN2*.**

- (a) Array CGH analysis confirmed the presence of acquired homozygous deletions restricted to the *PTPN2* locus in all individuals with low expression levels. Array CGH profiles suggested highly similar telomeric as well as centromeric breakpoints in 4 of the 5 individuals. Individual 2 displayed a similar focal deletion on one allele, but a larger deletion on the other allele. Blast cell content of individual 5 was about 50% resulting in a higher log ratio value than expected for homozygous deletion of *PTPN2*.
- (b) Quantitative PCR analysis of T-ALL individuals with homozygous loss of *PTPN2*. A primer set for *CDH2* (closed bars, 18q12) and *RNMT* (open bars, 18p11) was used for normalization.



**Supplementary Figure 3. Alignment of the two *Alu* elements flanking the *PTPN2* gene.**

- (a) Schematic presentation of the genetic region around the *PTPN2* locus and illustration of the breakpoint junctions. Sequence analysis of breakpoint junctions identified *Alu* elements at both sides with high sequence similarity. Figure depicts an alignment of the flanking *Alu* sequences. Recombinogenic hotspots are shown in red.<sup>1</sup> Identified breakpoint junctions are underlined.
- (b) BLAST2 analysis of the *Alu* sequences flanking the *PTPN2* locus (telomeric: *Alu* 1, centromeric: *Alu* 2) detected 82% identity between both elements. *Alu* elements were oriented in the same direction (strand=plus/plus) and both about 300 bp long.
- (c) Dot matrix view showing region of similarity based upon Blast2 results. X-axis and y-axis represent *Alu* sequence 1 and 2, respectively. Numbers indicate position on chromosome 18p11 (bp). Blast analysis identified one alignment through the entire length as shown in a single line.

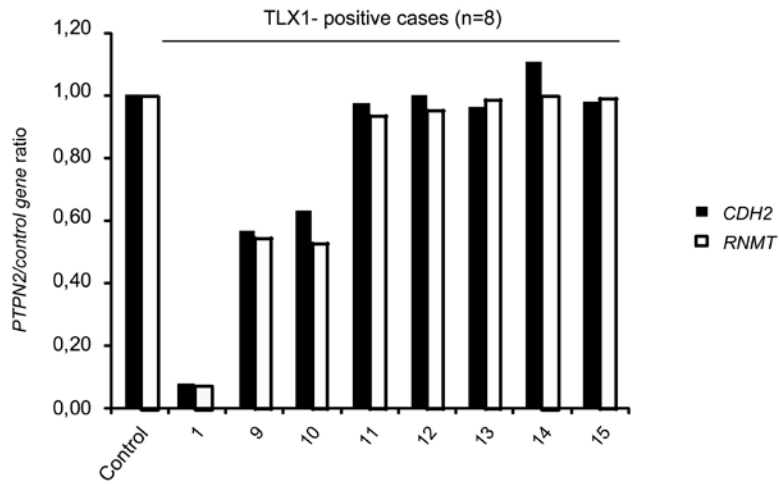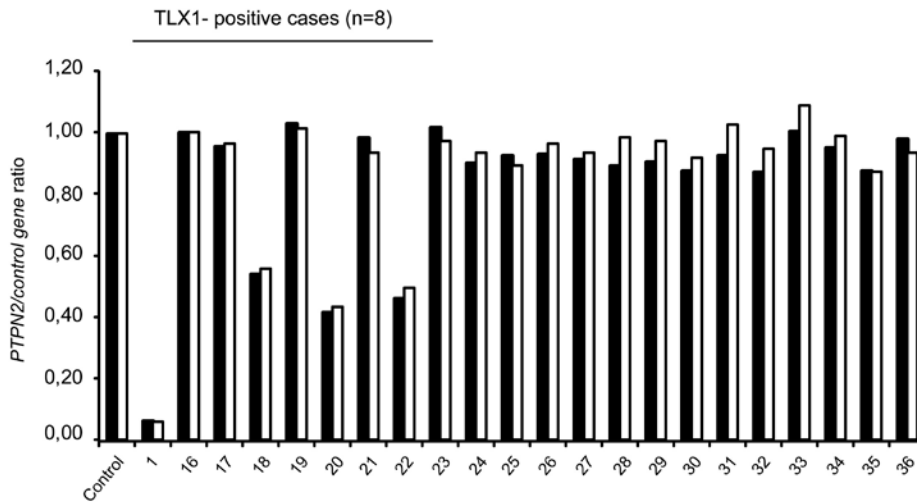

**Supplementary Figure 4. Heterozygous deletion of *PTPN2* in *TLX1* positive T-ALL.**

Quantitative PCR analysis of additional T-ALL samples identified 5 individuals with loss of one copy of *PTPN2*. A primer set for *CDH2* (closed bars, 18q12.1) and *RNMT* (open bars, 18p11.21) was used for normalization.

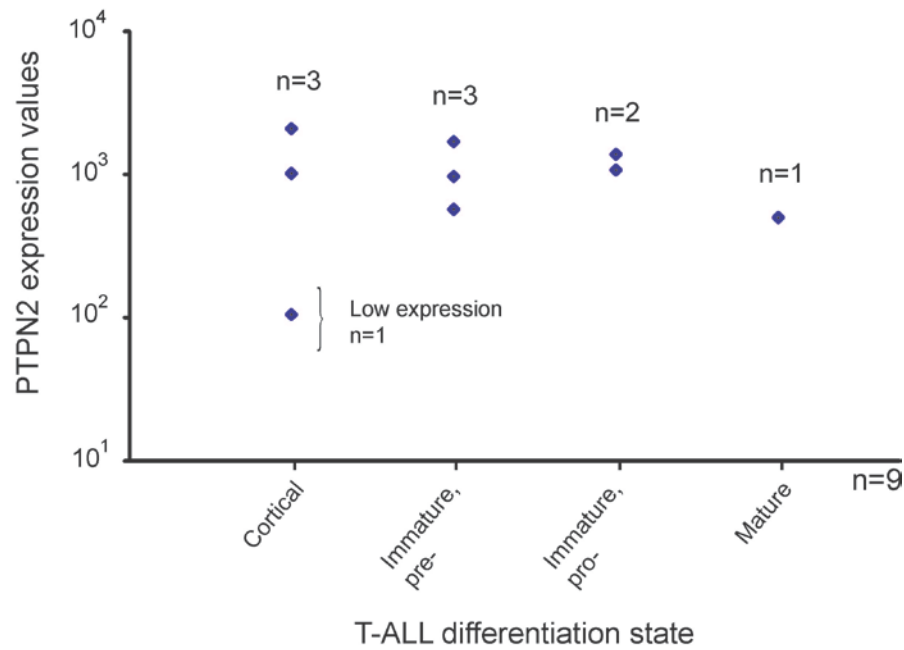

**Supplementary Figure 5. Gene expression analysis of T-ALL individual 7.**

PTPN2 expression level was analyzed in 9 individuals with T-ALL using Affymetrix gene expression arrays (probeset 213136\_at) and categorized according to the stage of differentiation (x-axis). Y-axis displays PTPN2 expression levels as a logarithmic scale. N indicates number of individuals analyzed. The case with low expression corresponds to individual 7 in the manuscript and was confirmed to harbor a bi-allelic deletion of PTPN2.

**Supplementary Figure 6. Schematic representation of CpG-rich regions near the *PTPN2* transcription start analyzed for DNA methylation.**

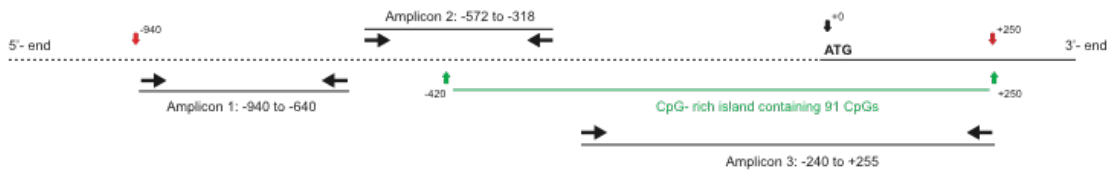

All individuals with heterozygous deletion of *PTPN2* (9, 10, 18, 20 and 22) were analyzed for the methylation status of CpG-rich regions located between sites -940 to +255 bp (red arrows). Translation start site of *PTPN2* was designated as 0 (**ATG**).

PCR amplicon -940 to -640: for all individuals both methylated and unmethylated CpGs were detected and therefore considered as partially methylated. Neither the methylation pattern nor the degree of methylation was found to be different between the groups and not specifically associated with low expression levels of *PTPN2*.

PCR amplicon -572 to -318: only thymidine peaks were observed independent of *PTPN2* expression levels and the entire CpG islands was counted as unmethylated.

PCR amplicon -240 to +255: only thymidine peaks were observed independent of *PTPN2* expression levels and the entire CpG islands was counted as unmethylated.



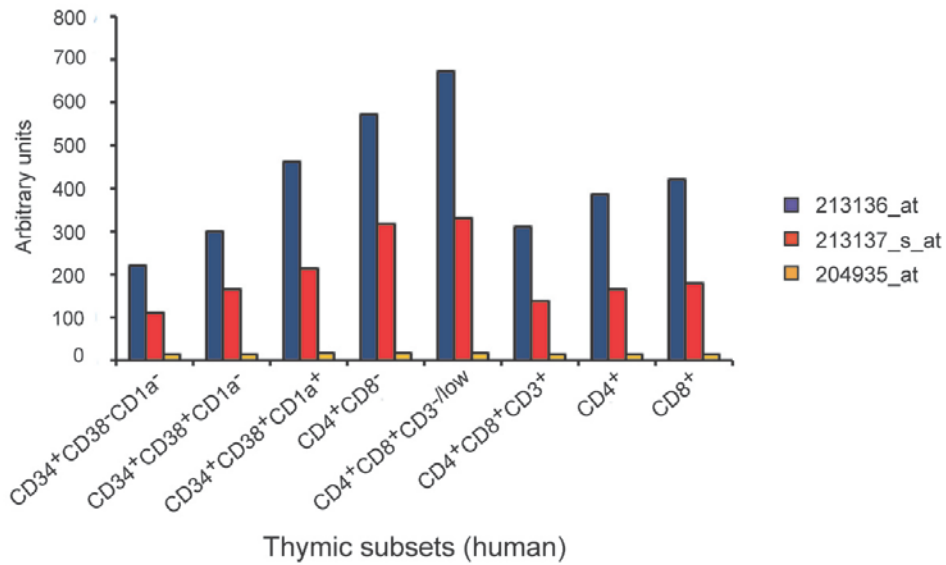

**Supplementary Figure 7. *PTPN2* expression peaks at the CD4<sup>+</sup>CD8<sup>+</sup>CD3<sup>-/low</sup> stage of T-cell development.**

Expression of *PTPN2* was detected at all stages of T-cell development with highest levels measured in the CD4<sup>+</sup>CD8<sup>+</sup>CD3<sup>-/low</sup> subset. Expression levels were determined using 3 different probesets 213136\_at, 213137\_s\_at and 204935\_at. Probeset 213136\_at showed the highest sensitivity resulting in the highest values, whereas no results were obtained with probeset 213137\_s\_at.

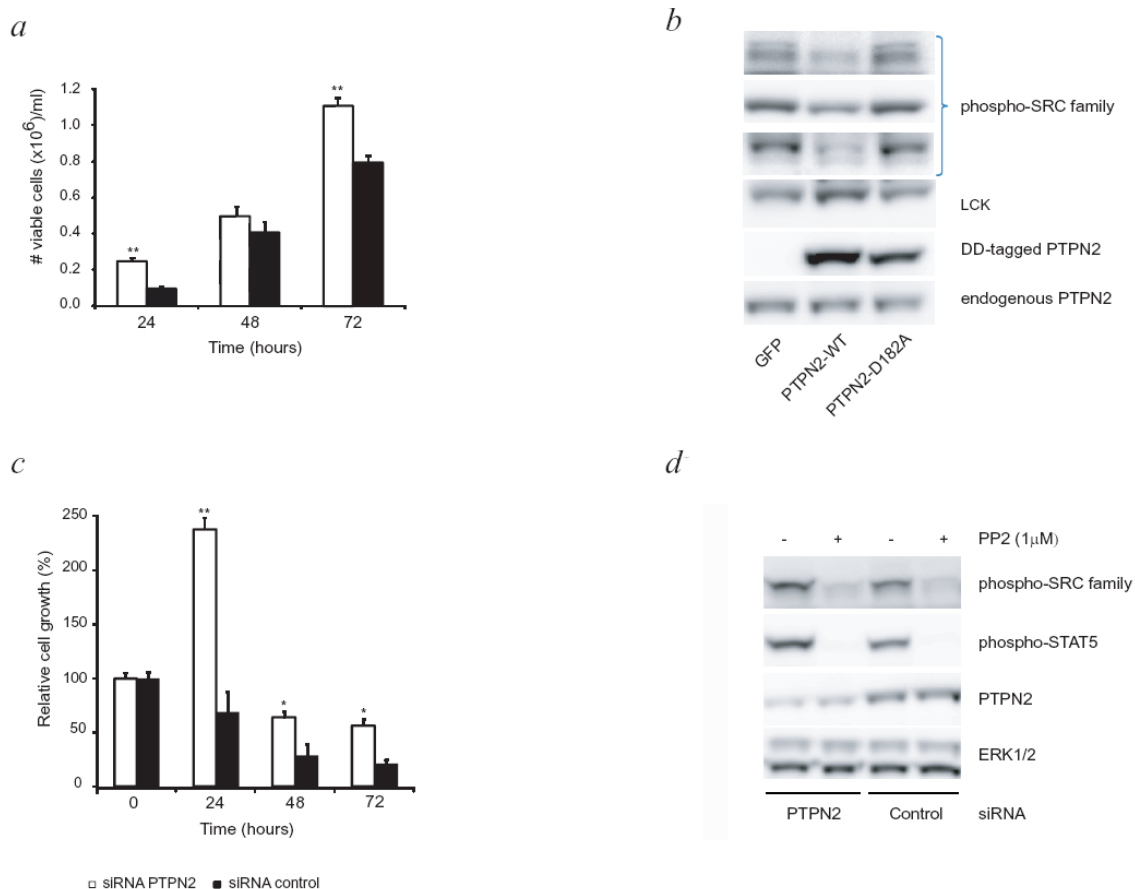

### Supplementary Figure 8. Proliferative advantage and decreased sensitivity to LCK inhibitor PP2 due to knockdown of PTPN2.

HSB-2 cells were electroporated with siRNA targeting PTPN2 (open bars) or control siRNA (closed bars). Treatment with PP2 was initiated 24 hours after electroporation and viability as well as proliferation was followed for 72 hours. For inhibitor experiments cell number of untreated control cells (siRNA control) was set as 100% and y-axis displays relative cell growth. All values represent the average  $\pm$  s.e.m. of three determinations.

- (a) Viable cell numbers of untreated cells were determined 24, 48 and 72 hours after electroporation with respective siRNAs. Decrease in PTPN2 protein levels resulted in a proliferative advantage of the cells compared to control cells.
- (b) HSB-2 cells were exposed to Shield1 compound for 24 hours to induce overexpression of PTPN2 wild type (PTPN2-WT) or mutant (PTPN2-D182A). Overexpression of PTPN2 wild type, but not the inactive trapping mutant caused reduced phosphorylation of LCK kinase and other members of the SRC-family kinase. Blots were stripped and reprobbed with LCK antibody as loading control.
- (c) Relative cell growth of HSB-2 cells treated with LCK inhibitor PP2 (1  $\mu$ M).
- (d) WB analysis of HSB-2 cells detected increased activation of STAT5 and a member of the SRC kinase family due to reduction in expression of PTPN2. ERK1/2 was used to ensure equal loading

## Supplementary Tables

Supplementary Table 1. Cytogenetic and molecular findings in individuals with *PTPN2* deletion

| Individual | Previously published (ID) | <i>CDKN2A</i>     | <i>NOTCH1</i> mutation                                   | <i>NUP214-ABL1</i> | <i>TLX1, TLX3</i> | Others                                                  |
|------------|---------------------------|-------------------|----------------------------------------------------------|--------------------|-------------------|---------------------------------------------------------|
| 1          | No                        | <i>CDKN2A</i> -/- | 4799 T>C, L1600P                                         | -                  | <i>TLX1</i>       |                                                         |
| 2          | Yes (TL52) <sup>2</sup>   | <i>CDKN2A</i> -/- | na                                                       | +                  | <i>TLX1</i>       |                                                         |
| 3          | Yes (TL54) <sup>2</sup>   | <i>CDKN2A</i> -/- | na                                                       | -                  | <i>TLX1</i>       |                                                         |
| 4          | Yes (TL57) <sup>2</sup>   | <i>CDKN2A</i> -/- | 4851insGAG, F1617LS                                      | -                  | <i>TLX1</i>       |                                                         |
| 5          | Yes (TL59) <sup>2</sup>   | <i>CDKN2A</i> -/- | no mutation                                              | +                  | <i>TLX1</i>       | <i>FBXW7</i> : C1542T, R465C;<br><i>MYB</i> duplication |
| 6          | Yes (TL71) <sup>2</sup>   | <i>CDKN2A</i> -/- | C7177T, Q2393*                                           | -                  | <i>TLX3</i>       |                                                         |
| 7          | No                        | <i>CDKN2A</i> -/- | 5039 T>A, I1680N<br>6555 C>T, D2185D                     | -                  | <i>TLX1</i>       |                                                         |
| 8          | No                        | <i>CDKN2A</i> -/- | 4727 T>A, V1576D<br>5094 C>T, D1698D<br>6555 C>T, D2185D | -                  | <i>TLX1</i>       |                                                         |

| Individual | Previously published (ID) | <i>CDKN2A</i>                | <i>NOTCH1</i> mutation                                     | <i>NUP214-ABL1</i> |             | Others                                         |
|------------|---------------------------|------------------------------|------------------------------------------------------------|--------------------|-------------|------------------------------------------------|
| 9          | Yes (1944) <sup>3</sup>   | <i>CDKN2A</i> <sup>-/-</sup> | 5025 C>G, I1675M;<br>5026 G>T, V1676F;<br>7516 G>T, Q2506* | +                  | <i>TLX1</i> |                                                |
| 10         | Yes (2737) <sup>3</sup>   | <i>CDKN2A</i> <sup>-/-</sup> | 4733T>A, V1578E                                            | -                  | <i>TLX1</i> |                                                |
| 18         | No                        | <i>CDKN2A</i> <sup>+/-</sup> | 4793 G>C, R1598P;<br>6555 C>T, D2185D                      | -                  | <i>TLX1</i> | <i>MYB</i> duplication;<br><i>RB1</i> deletion |
| 20         | No                        | <i>CDKN2A</i> <sup>-/-</sup> | 4793 C>G, R1598P                                           | +                  | <i>TLX1</i> |                                                |
| 22         | No                        | <i>CDKN2A</i> <sup>-/-</sup> | 5153 T>C, I1718T;<br>7383_7384insGC,<br>P2461Afs*15        | -                  | <i>TLX1</i> |                                                |

Molecular information on *CDKN2A* (FISH or array data), *NOTCH1*, *NUP214-ABL1* (RT-PCR, array and/or FISH data), common transcription factor overexpression (RT-PCR or gene expression profiling data for *TAL1*, *LMO1*, *LMO2*, *LYL1*, *TLX1*, *TLX3*, *HOXA*, *MLL* fusions, or *CALM-AF10*), *MYB* duplication, *RB1* deletion, *PTEN* deletion or mutation, *FBXW7* mutation.<sup>2,4,5</sup> Individuals identified with homozygous deletion of *PTPN2* are referred to as individuals 2-6 in this manuscript and have been referred to TL52, TL54, TL57, TL59, and TL71 respectively by Soulier *et al.*, 2005. *NOTCH1* mutations: numbering according to start codon of transcript ENST00000277541. *FBXW7* mutations: numbering according to transcript ENST00000281708.

## Supplementary Table 2. Primer sequences

### Sequence analysis of *PTPN2* in T-ALL individuals and cell lines

Coding region of *PTPN2* was amplified and subsequently analyzed applying a nested sequence strategy unless otherwise indicated<sup>†</sup>. Exon 1 was sequenced with the indicated reverse primer only. Exon 9: refers to exon 9 of *PTPN2* variant 1 (NM\_002828), exon 9s refers to exon 9 of *PTPN2* variant 2 (NM\_080422), exon 9v refers to exon 10 of *PTPN2* variant 2 (NM\_080422) and exon 9 of *PTPN2* variant 3 (NM\_080423).

| Exon  | Forward amplification primer (5'-3') | Reverse amplification primer (5'-3') |
|-------|--------------------------------------|--------------------------------------|
| 1     | CTCTTGTCGGAAGACGCAAG                 | AGGAGCAAGAGAGCGGTCAG                 |
| 2     | TTACGCTGGCTGGGAAGATA                 | CCAAGCCCTCCTTTTCACTA                 |
| 3     | CAAGATTGCATTTTATACTCCTTACAA          | AAGCTTCAAAAACCTTATAATGTCCA           |
| 4     | TCAGGTAGATTGGAAGTCTTGG               | TCCGGACAGAAACACTTTGA                 |
| 5     | GTGACTTCTTAGTTTTGGTACTTGA            | CCTCAGAAAGCTACTAGATGCAGA             |
| 6     | TGGGATTGTCAGAAAACAAATG               | GCAACGGTGGAAATGAGATT                 |
| 7     | GATGTGGGGAGGGATGAGTA                 | GACAGCCAGCTGGATTTACC                 |
| 8     | TGTTACAAGCTACAGTATGGCAA              | CAGGCGTGATTGTATTTTCCT                |
| 9     | CCCTCATTATTCCAGTGTTCAA               | ACAGTTGCAAATTTACCAGTTTTT             |
| 9s    | TTCCAGTGTTCAAATAGGGTGA               | ACTGCACCGTTTTTGGGATA                 |
| 9v/10 | CCAGCCGTTTTACCCTAAGA                 | CTCGGCAGTATGTCAATTGCT                |

| Exon  | Forward sequence primer (5'-3') | Reverse sequence primer (5'-3') |
|-------|---------------------------------|---------------------------------|
| 1     | -                               | GAGCGAGAGGCTAGAGGCGAGA          |
| 2     | TACGCTGGCTGGGAAGATAA            | GCCCTCCTTTTCACTACATCC           |
| 3     | GATTGCATTTTATACTCCTTACAAAAA     | AGCTTCAAAAACCTTATAATGTCCA       |
| 4     | CAGGTAGATTGGAAGTCTTGGTTT        | CACTTTGACCGCTAGCCTTT            |
| 5     | TGACTTCTTAGTTTTGGTACTTGAA       | TCCTCAGAAAGCTACTAGATGCAG        |
| 6     | TCAGAAAACAAATGGAAAATCATAGT      | ACTGCCAGTGGAAAGCAATTT           |
| 7     | GAGGGTTAAATTATCGTTGTTCTTT       | ACCACAAAAATTCAAATACACTCTTT      |
| 8     | GGCAAAATGCCTTTTTCTTTT           | CCTGAAATCCTATGGCACCT            |
| 9     | TTCCAGTGTTCAAATAGGGTGA          | CAGTTGCAAATTTACCAGTTTTT         |
| 9s    | -*                              | -*                              |
| 9v/10 | -*                              | CGGCAGTATGTCAATTGCTTG           |

### Sequence analysis of *NOTCH1* in T-ALL individuals

All individuals with homozygous or heterozygous deletion of *PTPN2* were analyzed for mutations in HD-N (exon 26), HD-C (exon 27) and PEST domain (exon 34) of *NOTCH1* using the following primer pairs. Nested primers were used for sequence analysis of amplicons unless indicated otherwise<sup>†</sup>.

Sequence analysis of Individuals 4, 5 and 6 were performed as described previously.<sup>6</sup>

Ampl: amplification primer; seq: sequence primer.

| Exon               | Forward primer (5'-3')    | Reverse primer (5'-3') |
|--------------------|---------------------------|------------------------|
| 26 <sub>ampl</sub> | TGAGGGAGGACCTGAACTTG      | TGGAATGCTGCCTCTACTCC   |
| 26 <sub>seq</sub>  | -*                        | CACGCTTGAAGACCACGTT    |
| 27 <sub>ampl</sub> | GTTGGTGGGTATCTGGGATG      | CGGAGTGCCATTCAGAAAAT   |
| 27 <sub>seq</sub>  | CGGGGGAGGAGGAAG           | CTGCAGGCAGAGCCTGTT     |
| 34 <sub>ampl</sub> | CCATGGCTACCTGTCAGACG      | TGGCTCTCAGAACTTGCTTGT  |
| 34 <sub>seq</sub>  | -* / GCTGCACAGTAGCCTTGCTG | -*                     |

## Quantitative PCR

*CDH2* (18q12.1) and *RNMT* (18p11.21) were used as control genes to determine the copy number status of *PTPN2*.

| Gene         | Forward primer (5'-3')  | Reverse primer (5'-3') |
|--------------|-------------------------|------------------------|
| <i>CDH2</i>  | TGAGAGAATCTGGCTCCTTGAAC | GCCCAATGCCTGCACTACA    |
| <i>RNMT</i>  | TGCAGTTGTCAGTTTGTCTGTCA | CACGCATTTCTCAGCATCATG  |
| <i>PTPN2</i> | TGAGAGAATCTGGCTCCTTGAAC | GCCCAATGCCTGCACTACA    |

## Genomic analysis of breakpoints

*PTPN2* breakpoints were analyzed using nested PCR with the following primer combinations in six individuals: ampl = amplification primer; seq: sequencing primer

| Pair              | Forward primer (5'-3') | Reverse primer (5'-3') |
|-------------------|------------------------|------------------------|
| 1 <sub>ampl</sub> | ACCAACTGCATCCACCAATC   | CCTTCCTGTTGGTCCACATT   |
| 2 <sub>seq</sub>  | ACATGACACCTGGGGCTAAG   | AAAGCAGACCCTGAGACCAA   |

## Expression analysis (quantitative RT-PCR)

| Gene         | Forward primer (5'-3')   | Reverse primer (5'-3') |
|--------------|--------------------------|------------------------|
| <i>HPRT</i>  | TGACACTGGCAAACAATGCA     | GGTCCTTTTCACCAGCAAGCT  |
| <i>PTPN2</i> | CCAGTTTAGTTGACATAGAAGAGG | GCAGCATGTGTTAGGAAGT    |

## Primer sequences used for analysis of the methylation status of *PTPN2*

| PCR fragment                 | Forward primer (5'-3')     | Reverse primer (5'-3')      |
|------------------------------|----------------------------|-----------------------------|
| -940 to -640 <sub>ampl</sub> | GGTTGGTGTTATTGAGGAATTA     | AAAAAAAAAACAACCAACCTCT      |
| -940 to -640 <sub>seq</sub>  | TTGGTGTTATTGAGGAATTAAGTTAA | AAAAAAAAAACAACCAACCTCT      |
| -572 to -318 <sub>ampl</sub> | GAGGAATTTGTTTTTAAGTTGGTT   | ATAAACCRCCCCTTAACTTA        |
| -572 to -318 <sub>seq</sub>  | AGGAATTTGTTTTTAAGTTGGTT    | -*                          |
| -420 to +255 <sub>ampl</sub> | TTTTAGGGGATTTTTTAGGGAGT    | TTTTAAACCAAAAAAAAAACAAAAAAC |
| -420 to +74 <sub>seq</sub>   | TTTAGGGGATTTTTTAGGGAGTT    | CTCACCAAATACAARGACTACCAAC   |

## References

1. Rudiger, N.S., Gregersen, N. & Kielland-Brandt, M.C. One short well conserved region of Alu-sequences is involved in human gene rearrangements and has homology with prokaryotic chi. *Nucleic Acids Res* **23**, 256-60 (1995).
2. Soulier, J. et al. HOXA genes are included in genetic and biologic networks defining human acute T-cell leukemia (T-ALL). *Blood* **106**, 274-86 (2005).
3. Van Vlierberghe, P. et al. The recurrent SET-NUP214 fusion as a new HOXA activation mechanism in pediatric T-cell acute lymphoblastic leukemia. *Blood* **111**, 4668-80 (2008).
4. Clappier, E. et al. The C-MYB locus is involved in chromosomal translocation and genomic duplications in human T-cell acute leukemia (T-ALL), the translocation defining a new T-ALL subtype in very young children. *Blood* **110**, 1251-61 (2007).
5. Bene, M.C. et al. Proposals for the immunological classification of acute leukemias. European Group for the Immunological Characterization of Leukemias (EGIL). *Leukemia* **9**, 1783-6 (1995).
6. Asnafi, V. et al. NOTCH1/FBXW7 mutation identifies a large subgroup with favorable outcome in adult T-cell acute lymphoblastic leukemia (T-ALL): a Group for Research on Adult Acute Lymphoblastic Leukemia (GRAALL) study. *Blood* **113**, 3918-24 (2009).
